# Supplementary material for: Bifidobacterium longum subsp. infantis CECT 7210 Reduces Inflammatory Cytokine Secretion in Caco-2 Cells Cultured in the Presence of Escherichia coli CECT 515
Source: MDPI journal article supplement (doi:10.3390/ijms231810813), 2022-09-16
Supplement: s1 [file s1]

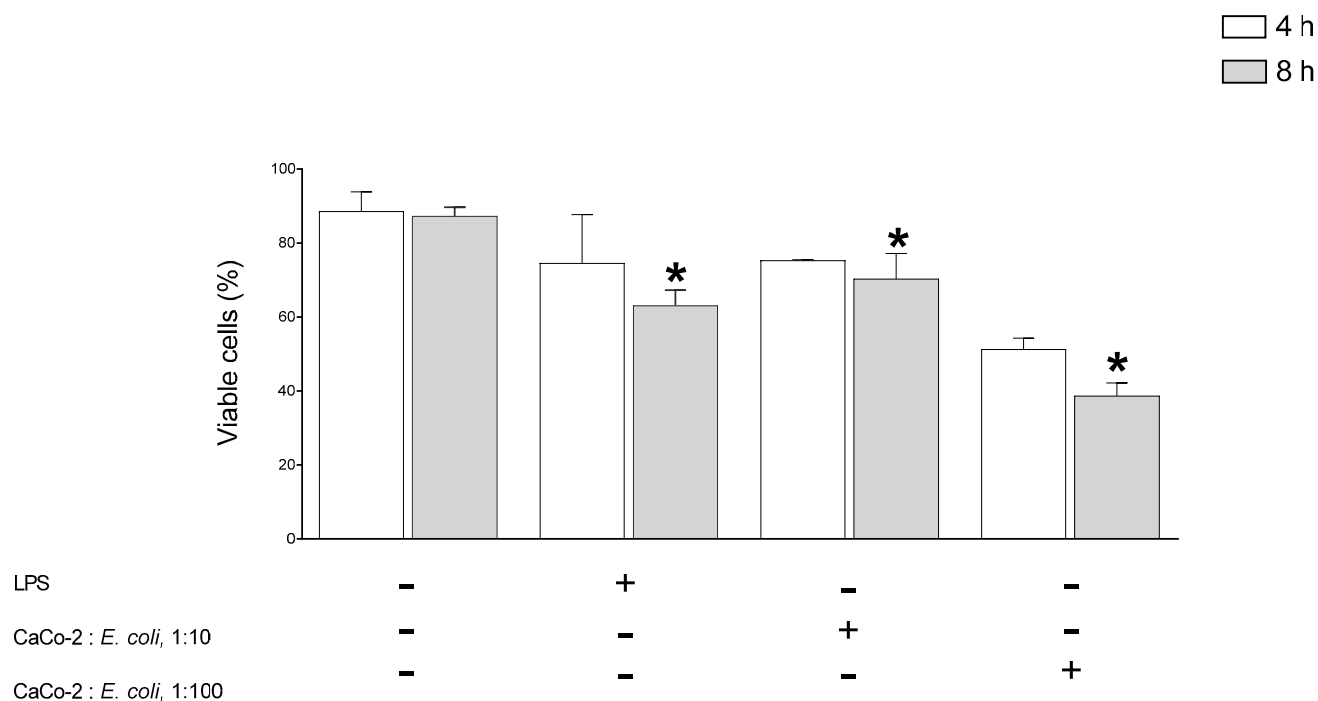

**Supplementary Figure S1.** Flow cytometry analysis of Caco-2 cell viability. Incubation of Caco-2 cells in the presence of LPS or *E. coli* CECT 515 (ratios 1:10 and 1:100, Caco-2:*E. coli*) for 4 (white bars) and 8 hours (grey bars). Results are expressed in percentages as mean  $\pm$  SEM of three independent experiments. \*p < 0.05 vs. control (untreated cells).

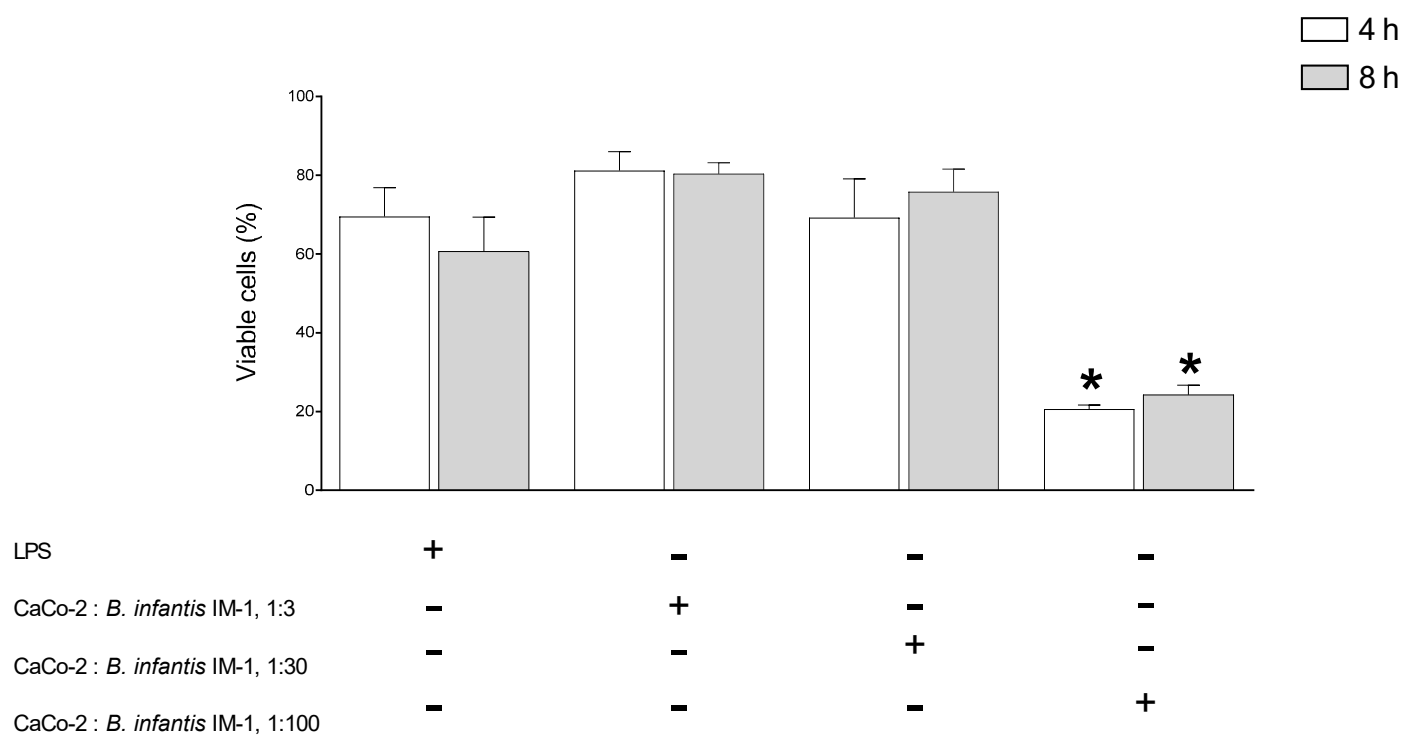

**Supplementary Figure S2.** Flow cytometry analysis of Caco-2 cell viability. Incubation of Caco-2 cells in the presence of *B. infantis* IM-1® (ratios 1:3, 1:30 and 1:100, Caco-2:*B. infantis* IM-1®) or *B. infantis* IM-1® for 4 (white bars) and 8 hours (grey bars). Results are expressed in percentages as mean  $\pm$  SEM of three independent experiments. \*p < 0.05 vs. control (untreated cells).
